# Supplementary material for: Optimizing Training Population Data and Validation of Genomic Selection for Economic Traits in Soft Winter Wheat
Source: PubMed Central journal article supplement (PMC5015948; doi:10.1534/g3.116.032532), 2016-07-20
Supplement: supp_g3.116.032532_TableS1.pdf [file supp_g3.116.032532_TableS1.pdf]

Table S1. Summary of the entry, name, and pedigree of the 470 lines in the training population (TP)

| Entry | Name        | Pedigree                    |
|-------|-------------|-----------------------------|
| 1     | OH08-198-22 | VA98W-706 / IL96-6472       |
| 2     | OH08-199-1  | VA98W-706 / IL96-6472       |
| 3     | OH08-199-73 | VA98W-706 / IL96-6472       |
| 4     | OH08-199-77 | VA98W-706 / IL96-6472       |
| 5     | OH08-200-11 | VA98W-706 / IL96-6472       |
| 6     | OH08-200-17 | VA98W-706 / IL96-6472       |
| 7     | OH08-200-25 | VA98W-706 / IL96-6472       |
| 8     | OH08-200-55 | VA98W-706 / IL96-6472       |
| 9     | OH08-200-7  | VA98W-706 / IL96-6472       |
| 10    | OH07-106-72 | OH751 / BRAVO               |
| 11    | OH07-107-27 | OH751 / BRAVO               |
| 12    | OH07-124-30 | HONEY / BRAVO               |
| 13    | OH07-124-37 | HONEY / BRAVO               |
| 14    | OH07-125-36 | HONEY / BRAVO               |
| 15    | OH07-125-55 | HONEY / BRAVO               |
| 16    | OH07-131-6  | HONEY / OH708               |
| 17    | OH07-147-22 | HONEY / ROANE               |
| 18    | OH07-148-12 | HONEY / ROANE               |
| 19    | OH07-161-29 | OH708 / HOPEWELL            |
| 20    | OH07-162-24 | OH708 / HOPEWELL            |
| 21    | OH07-174-62 | OH708 / P.92145E8-7-7-1-9   |
| 22    | OH07-189-72 | ROANE / P.92145E8-7-7-1-9   |
| 23    | OH07-191-41 | ROANE / P.92145E8-7-7-1-9   |
| 24    | OH07-238-15 | P.92145E8-7-7-1-9 / TRIBUTE |
| 25    | OH07-238-53 | P.92145E8-7-7-1-9 / TRIBUTE |
| 26    | OH07-259-12 | HONEY / HOPEWELL            |
| 27    | OH07-259-2  | HONEY / HOPEWELL            |
| 28    | OH07-259-28 | HONEY / HOPEWELL            |
| 29    | OH07-259-8  | HONEY / HOPEWELL            |
| 30    | OH07-262-25 | HONEY / BRAVO               |
| 31    | OH07-264-30 | OH708 / P.92145E8-7-7-1-9   |
| 32    | OH07-264-58 | OH751 / BRAVO               |
| 33    | OH07-264-70 | OH751 / BRAVO               |
| 34    | OH07-264-74 | OH751 / BRAVO               |
| 35    | OH07-74-15  | HONEY / FREEDOM             |
| 36    | OH07-74-24  | HONEY / FREEDOM             |
| 37    | OH07-74-44  | HONEY / FREEDOM             |
| 38    | OH07-75-1   | HONEY / FREEDOM             |

|    |             |                           |
|----|-------------|---------------------------|
| 39 | OH07-75-10  | HONEY / FREEDOM           |
| 40 | OH07-75-45  | HONEY / FREEDOM           |
| 41 | OH07-78-11  | ROANE / FREEDOM           |
| 42 | OH07-78-27  | ROANE / FREEDOM           |
| 43 | OH07-80-59  | ROANE / FREEDOM           |
| 44 | OH07-85-25  | PATTON / HOPEWELL         |
| 45 | OH07-85-50  | PATTON / HOPEWELL         |
| 46 | OH07-85-59  | PATTON / HOPEWELL         |
| 47 | OH07-85-7   | PATTON / HOPEWELL         |
| 48 | OH07-86-37  | PATTON / HOPEWELL         |
| 49 | OH07-86-63  | PATTON / HOPEWELL         |
| 50 | OH07-86-73  | PATTON / HOPEWELL         |
| 51 | OH07-87-25  | PATTON / HOPEWELL         |
| 52 | OH07-124-66 | HONEY / BRAVO             |
| 53 | OH07-132-78 | HONEY / OH708             |
| 54 | OH07-131-73 | HONEY / OH708             |
| 55 | OH07-130-78 | HONEY / OH708             |
| 56 | OH07-131-4  | HONEY / OH708             |
| 57 | OH07-130-17 | HONEY / OH708             |
| 58 | OH07-148-21 | HONEY / ROANE             |
| 59 | OH07-148-42 | HONEY / ROANE             |
| 60 | OH07-148-1  | HONEY / ROANE             |
| 61 | OH07-147-26 | HONEY / ROANE             |
| 62 | OH07-147-30 | HONEY / ROANE             |
| 63 | OH07-160-52 | OH708 / HOPEWELL          |
| 64 | OH07-160-61 | OH708 / HOPEWELL          |
| 65 | OH07-160-72 | OH708 / HOPEWELL          |
| 66 | OH07-162-35 | OH708 / HOPEWELL          |
| 67 | OH07-161-62 | OH708 / HOPEWELL          |
| 68 | OH07-162-65 | OH708 / HOPEWELL          |
| 69 | OH07-159-62 | OH708 / HOPEWELL          |
| 70 | OH07-162-17 | OH708 / HOPEWELL          |
| 71 | OH07-162-12 | OH708 / HOPEWELL          |
| 72 | OH07-161-56 | OH708 / HOPEWELL          |
| 73 | OH07-174-77 | OH708 / P.92145E8-7-7-1-9 |
| 74 | OH07-175-34 | OH708 / P.92145E8-7-7-1-9 |
| 75 | OH07-264-49 | OH708 / P.92145E8-7-7-1-9 |
| 76 | OH07-264-35 | OH708 / P.92145E8-7-7-1-9 |
| 77 | OH07-176-46 | OH708 / P.92145E8-7-7-1-9 |
| 78 | OH07-173-28 | OH708 / P.92145E8-7-7-1-9 |
| 79 | OH07-175-8  | OH708 / P.92145E8-7-7-1-9 |
| 80 | OH07-173-64 | OH708 / P.92145E8-7-7-1-9 |
| 81 | OH07-173-56 | OH708 / P.92145E8-7-7-1-9 |
| 82 | OH07-174-11 | OH708 / P.92145E8-7-7-1-9 |
| 83 | OH07-175-73 | OH708 / P.92145E8-7-7-1-9 |

|     |             |                             |
|-----|-------------|-----------------------------|
| 84  | OH07-176-6  | OH708 / P.92145E8-7-7-1-9   |
| 85  | OH07-173-50 | OH708 / P.92145E8-7-7-1-9   |
| 86  | OH07-176-56 | OH708 / P.92145E8-7-7-1-9   |
| 87  | OH07-175-11 | OH708 / P.92145E8-7-7-1-9   |
| 88  | OH07-174-50 | OH708 / P.92145E8-7-7-1-9   |
| 89  | OH07-240-55 | P.92145E8-7-7-1-9 / TRIBUTE |
| 90  | OH07-237-12 | P.92145E8-7-7-1-9 / TRIBUTE |
| 91  | OH07-238-14 | P.92145E8-7-7-1-9 / TRIBUTE |
| 92  | OH07-240-66 | P.92145E8-7-7-1-9 / TRIBUTE |
| 93  | OH07-237-45 | P.92145E8-7-7-1-9 / TRIBUTE |
| 94  | OH07-80-74  | ROANE / FREEDOM             |
| 95  | OH07-88-63  | ROANE / HOPEWELL            |
| 96  | OH07-88-53  | ROANE / HOPEWELL            |
| 97  | OH07-89-22  | ROANE / HOPEWELL            |
| 98  | OH07-89-57  | ROANE / HOPEWELL            |
| 99  | OH07-258-27 | ROANE / P.92145E8-7-7-1-9   |
| 100 | OH07-190-10 | ROANE / P.92145E8-7-7-1-9   |
| 101 | OH07-191-66 | ROANE / P.92145E8-7-7-1-9   |
| 102 | OH07-191-70 | ROANE / P.92145E8-7-7-1-9   |
| 103 | OH07-190-56 | ROANE / P.92145E8-7-7-1-9   |
| 104 | OH07-189-56 | ROANE / P.92145E8-7-7-1-9   |
| 105 | OH07-190-42 | ROANE / P.92145E8-7-7-1-9   |
| 106 | OH07-191-45 | ROANE / P.92145E8-7-7-1-9   |
| 107 | OH07-189-28 | ROANE / P.92145E8-7-7-1-9   |
| 108 | OH07-188-68 | ROANE / P.92145E8-7-7-1-9   |
| 109 | OH07-95-19  | ROANE / PATTON              |
| 110 | OH07-94-6   | ROANE / PATTON              |
| 111 | OH07-95-58  | ROANE / PATTON              |
| 112 | OH07-94-70  | ROANE / PATTON              |
| 113 | OH07-93-15  | ROANE / PATTON              |
| 114 | OH07-95-7   | ROANE / PATTON              |
| 115 | OH07-93-62  | ROANE / PATTON              |
| 116 | OH07-95-33  | ROANE / PATTON              |
| 117 | OH07-174-17 | OH708 / P.92145E8-7-7-1-9   |
| 118 | OH07-190-12 | ROANE / P.92145E8-7-7-1-9   |
| 119 | OH07-191-62 | ROANE / P.92145E8-7-7-1-9   |
| 120 | OH07-258-42 | ROANE / P.92145E8-7-7-1-9   |
| 121 | OH08-100-38 | TRUMAN / IL97-3632          |
| 122 | OH08-100-74 | TRUMAN / IL97-3632          |
| 123 | OH08-101-34 | TRUMAN / IL96-6472          |
| 124 | OH08-101-38 | TRUMAN / IL96-6472          |
| 125 | OH08-101-57 | TRUMAN / IL96-6472          |
| 126 | OH08-101-72 | TRUMAN / IL96-6472          |
| 127 | OH08-102-18 | TRUMAN / IL96-6472          |
| 128 | OH08-102-45 | TRUMAN / IL96-6472          |

|     |             |                      |
|-----|-------------|----------------------|
| 129 | OH08-103-12 | TRUMAN / IL96-6472   |
| 130 | OH08-103-70 | TRUMAN / IL96-6472   |
| 131 | OH08-104-32 | TRUMAN / IL96-6472   |
| 132 | OH08-104-41 | TRUMAN / IL96-6472   |
| 133 | OH08-106-15 | TRUMAN / OH751       |
| 134 | OH08-106-50 | TRUMAN / OH751       |
| 135 | OH08-106-66 | TRUMAN / OH751       |
| 136 | OH08-106-67 | TRUMAN / OH751       |
| 137 | OH08-107-16 | TRUMAN / OH751       |
| 138 | OH08-107-38 | TRUMAN / OH751       |
| 139 | OH08-107-4  | TRUMAN / OH751       |
| 140 | OH08-130-4  | HOPEWELL / BRAVO     |
| 141 | OH08-130-54 | HOPEWELL / BRAVO     |
| 142 | OH08-130-76 | HOPEWELL / BRAVO     |
| 143 | OH08-131-11 | HOPEWELL / BRAVO     |
| 144 | OH08-131-15 | HOPEWELL / BRAVO     |
| 145 | OH08-131-56 | HOPEWELL / BRAVO     |
| 146 | OH08-134-12 | HONEY / FREEDOM      |
| 147 | OH08-107-46 | TRUMAN / OH751       |
| 148 | OH08-107-50 | TRUMAN / OH751       |
| 149 | OH08-107-8  | TRUMAN / OH751       |
| 150 | OH08-134-39 | HONEY / FREEDOM      |
| 151 | OH08-134-52 | HONEY / FREEDOM      |
| 152 | OH08-135-13 | HONEY / FREEDOM      |
| 153 | OH08-135-64 | HONEY / FREEDOM      |
| 154 | OH08-136-10 | HONEY / FREEDOM      |
| 155 | OH08-136-16 | HONEY / FREEDOM      |
| 156 | OH08-136-18 | HONEY / FREEDOM      |
| 157 | OH08-136-43 | HONEY / FREEDOM      |
| 158 | OH08-156-69 | ROANE / PATTON       |
| 159 | OH08-156-7  | ROANE / PATTON       |
| 160 | OH08-141-33 | HONEY / ROANE        |
| 161 | OH08-141-6  | HONEY / ROANE        |
| 162 | OH08-142-25 | PATTERSON / HOPEWELL |
| 163 | OH08-142-43 | PATTERSON / HOPEWELL |
| 164 | OH08-142-63 | PATTERSON / HOPEWELL |
| 165 | OH08-143-26 | PATTERSON / HOPEWELL |
| 166 | OH08-143-62 | PATTERSON / HOPEWELL |
| 167 | OH08-144-23 | PATTERSON / HOPEWELL |
| 168 | OH08-144-7  | PATTERSON / HOPEWELL |
| 169 | OH08-146-1  | ROANE / HOPEWELL     |
| 170 | OH08-146-27 | ROANE / HOPEWELL     |
| 171 | OH08-146-43 | ROANE / HOPEWELL     |
| 172 | OH08-146-51 | ROANE / HOPEWELL     |
| 173 | OH08-161-4  | OH751 / OH738        |

|     |             |                         |
|-----|-------------|-------------------------|
| 174 | OH08-161-55 | OH751 / OH738           |
| 175 | OH08-161-78 | OH751 / OH738           |
| 176 | OH08-162-45 | OH751 / OH738           |
| 177 | OH08-162-66 | OH751 / OH738           |
| 178 | OH08-162-75 | OH751 / OH738           |
| 179 | OH08-163-16 | OH751 / OH738           |
| 180 | OH08-163-54 | OH751 / OH738           |
| 181 | OH08-163-62 | OH751 / OH738           |
| 182 | OH08-168-24 | DOUGLAS / IL97-3632     |
| 183 | OH08-168-38 | DOUGLAS / IL97-3632     |
| 184 | OH08-168-4  | DOUGLAS / IL97-3632     |
| 185 | OH08-146-59 | ROANE / HOPEWELL        |
| 186 | OH08-147-13 | ROANE / HOPEWELL        |
| 187 | OH08-147-19 | ROANE / HOPEWELL        |
| 188 | OH08-147-3  | ROANE / HOPEWELL        |
| 189 | OH08-147-65 | ROANE / HOPEWELL        |
| 190 | OH08-168-75 | DOUGLAS / IL97-3632     |
| 191 | OH08-169-13 | DOUGLAS / IL97-3632     |
| 192 | OH08-169-48 | DOUGLAS / IL97-3632     |
| 193 | OH08-170-66 | DOUGLAS / IL97-3632     |
| 194 | OH08-174-31 | DOUGLAS / OH751         |
| 195 | OH08-153-43 | PATTON / PATTERSON      |
| 196 | OH08-153-49 | PATTON / PATTERSON      |
| 197 | OH08-154-21 | PATTON / PATTERSON      |
| 198 | OH08-154-59 | PATTON / PATTERSON      |
| 199 | OH08-154-9  | PATTON / PATTERSON      |
| 200 | OH08-155-1  | ROANE / PATTON          |
| 201 | OH08-155-16 | ROANE / PATTON          |
| 202 | OH08-155-74 | ROANE / PATTON          |
| 203 | OH08-155-9  | ROANE / PATTON          |
| 204 | OH08-156-13 | ROANE / PATTON          |
| 205 | OH08-156-30 | ROANE / PATTON          |
| 206 | OH08-156-55 | ROANE / PATTON          |
| 207 | OH08-174-55 | DOUGLAS / OH751         |
| 208 | OH08-175-49 | DOUGLAS / OH751         |
| 209 | OH08-175-50 | DOUGLAS / OH751         |
| 210 | OH08-175-70 | DOUGLAS / OH751         |
| 211 | OH08-176-31 | DOUGLAS / OH751         |
| 212 | OH08-177-27 | DOUGLAS / P.92226E2-5-3 |
| 213 | OH08-177-9  | DOUGLAS / P.92226E2-5-3 |
| 214 | OH08-178-52 | DOUGLAS / P.92226E2-5-3 |
| 215 | OH08-178-63 | DOUGLAS / P.92226E2-5-3 |
| 216 | OH08-178-75 | DOUGLAS / P.92226E2-5-3 |
| 217 | OH08-179-14 | DOUGLAS / P.92226E2-5-3 |
| 218 | OH08-179-28 | DOUGLAS / P.92226E2-5-3 |

|     |             |                           |
|-----|-------------|---------------------------|
| 219 | OH08-179-69 | DOUGLAS / P.92226E2-5-3   |
| 220 | OH08-194-30 | VA98W-706 / OH751         |
| 221 | OH08-194-38 | VA98W-706 / OH751         |
| 222 | OH08-194-71 | VA98W-706 / OH751         |
| 223 | OH08-194-8  | VA98W-706 / OH751         |
| 224 | OH08-195-28 | VA98W-706 / OH751         |
| 225 | OH08-196-25 | VA98W-706 / OH751         |
| 226 | OH08-196-66 | VA98W-706 / OH751         |
| 227 | OH08-196-69 | VA98W-706 / OH751         |
| 228 | OH08-197-23 | VA98W-706 / OH751         |
| 229 | OH08-197-35 | VA98W-706 / OH751         |
| 230 | OH08-197-52 | VA98W-706 / OH751         |
| 231 | OH08-198-52 | VA98W-706 / IL96-6472     |
| 232 | OH08-198-66 | VA98W-706 / IL96-6472     |
| 233 | OH08-199-18 | VA98W-706 / IL96-6472     |
| 234 | OH08-201-18 | P.92226E2-5-3 / HONEY     |
| 235 | OH08-182-4  | DOUGLAS / OH708           |
| 236 | OH08-182-43 | DOUGLAS / OH708           |
| 237 | OH08-182-46 | DOUGLAS / OH708           |
| 238 | OH08-183-13 | DOUGLAS / OH708           |
| 239 | OH08-184-15 | VA98W-706 / P.92226E2-5-3 |
| 240 | OH08-184-17 | VA98W-706 / P.92226E2-5-3 |
| 241 | OH08-184-41 | VA98W-706 / P.92226E2-5-3 |
| 242 | OH08-184-47 | VA98W-706 / P.92226E2-5-3 |
| 243 | OH08-184-50 | VA98W-706 / P.92226E2-5-3 |
| 244 | OH08-184-78 | VA98W-706 / P.92226E2-5-3 |
| 245 | OH08-185-18 | VA98W-706 / P.92226E2-5-3 |
| 246 | OH08-185-43 | VA98W-706 / P.92226E2-5-3 |
| 247 | OH08-185-56 | VA98W-706 / P.92226E2-5-3 |
| 248 | OH08-185-66 | VA98W-706 / P.92226E2-5-3 |
| 249 | OH08-185-7  | VA98W-706 / P.92226E2-5-3 |
| 250 | OH08-185-70 | VA98W-706 / P.92226E2-5-3 |
| 251 | OH08-185-72 | VA98W-706 / P.92226E2-5-3 |
| 252 | OH08-186-32 | VA98W-706 / P.92226E2-5-3 |
| 253 | OH08-201-39 | P.92226E2-5-3 / HONEY     |
| 254 | OH08-202-14 | P.92226E2-5-3 / HONEY     |
| 255 | OH08-202-49 | P.92226E2-5-3 / HONEY     |
| 256 | OH08-202-58 | P.92226E2-5-3 / HONEY     |
| 257 | OH08-202-73 | P.92226E2-5-3 / HONEY     |
| 258 | OH08-203-14 | P.92226E2-5-3 / HONEY     |
| 259 | OH08-203-31 | P.92226E2-5-3 / HONEY     |
| 260 | OH08-203-5  | P.92226E2-5-3 / HONEY     |
| 261 | OH08-203-55 | P.92226E2-5-3 / HONEY     |
| 262 | OH08-204-22 | P.92226E2-5-3 / HONEY     |
| 263 | OH08-204-47 | P.92226E2-5-3 / HONEY     |

|     |             |                           |
|-----|-------------|---------------------------|
| 264 | OH08-204-50 | P.92226E2-5-3 / HONEY     |
| 265 | OH08-204-70 | P.92226E2-5-3 / HONEY     |
| 266 | OH08-204-8  | P.92226E2-5-3 / HONEY     |
| 267 | OH08-205-13 | P.92226E2-5-3 / OH751     |
| 268 | OH08-186-43 | VA98W-706 / P.92226E2-5-3 |
| 269 | OH08-187-15 | VA98W-706 / HONEY         |
| 270 | OH08-187-27 | VA98W-706 / HONEY         |
| 271 | OH08-187-59 | VA98W-706 / HONEY         |
| 272 | OH08-188-13 | VA98W-706 / HONEY         |
| 273 | OH08-190-1  | VA98W-706 / IL97-3632     |
| 274 | OH08-190-10 | VA98W-706 / IL97-3632     |
| 275 | OH08-190-22 | VA98W-706 / IL97-3632     |
| 276 | OH08-190-25 | VA98W-706 / IL97-3632     |
| 277 | OH08-190-48 | VA98W-706 / IL97-3632     |
| 278 | OH08-191-2  | VA98W-706 / IL97-3632     |
| 279 | OH08-191-31 | VA98W-706 / IL97-3632     |
| 280 | OH08-191-32 | VA98W-706 / IL97-3632     |
| 281 | OH08-191-42 | VA98W-706 / IL97-3632     |
| 282 | OH08-191-7  | VA98W-706 / IL97-3632     |
| 283 | OH08-191-76 | VA98W-706 / IL97-3632     |
| 284 | OH08-191-78 | VA98W-706 / IL97-3632     |
| 285 | OH08-205-19 | P.92226E2-5-3 / OH751     |
| 286 | OH08-205-21 | P.92226E2-5-3 / OH751     |
| 287 | OH08-205-36 | P.92226E2-5-3 / OH751     |
| 288 | OH08-205-75 | P.92226E2-5-3 / OH751     |
| 289 | OH08-206-19 | P.92226E2-5-3 / OH751     |
| 290 | OH08-206-67 | P.92226E2-5-3 / OH751     |
| 291 | OH08-206-69 | P.92226E2-5-3 / OH751     |
| 292 | OH08-206-74 | P.92226E2-5-3 / OH751     |
| 293 | OH08-206-8  | P.92226E2-5-3 / OH751     |
| 294 | OH08-207-12 | P.92226E2-5-3 / OH751     |
| 295 | OH08-207-3  | P.92226E2-5-3 / OH751     |
| 296 | OH08-207-31 | P.92226E2-5-3 / OH751     |
| 297 | OH08-207-33 | P.92226E2-5-3 / OH751     |
| 298 | OH08-207-41 | P.92226E2-5-3 / OH751     |
| 299 | OH08-192-23 | VA98W-706 / IL97-3632     |
| 300 | OH08-192-42 | VA98W-706 / IL97-3632     |
| 301 | OH08-192-50 | VA98W-706 / IL97-3632     |
| 302 | OH08-192-67 | VA98W-706 / IL97-3632     |
| 303 | OH08-193-13 | VA98W-706 / IL97-3632     |
| 304 | OH08-193-42 | VA98W-706 / IL97-3632     |
| 305 | OH08-193-61 | VA98W-706 / IL97-3632     |
| 306 | OH08-194-17 | VA98W-706 / OH751         |
| 307 | OH08-194-2  | VA98W-706 / OH751         |
| 308 | OH08-223-53 | IL98-4364 / OH740         |

|     |             |                           |
|-----|-------------|---------------------------|
| 309 | OH08-224-15 | IL98-4364 / OH740         |
| 310 | OH08-224-75 | IL98-4364 / OH740         |
| 311 | OH08-225-32 | IL98-4364 / OH751         |
| 312 | OH08-225-71 | IL98-4364 / OH751         |
| 313 | OH08-226-22 | IL98-4364 / OH751         |
| 314 | OH08-226-26 | IL98-4364 / OH751         |
| 315 | OH08-226-59 | IL98-4364 / OH751         |
| 316 | OH08-207-56 | P.92226E2-5-3 / OH751     |
| 317 | OH08-207-58 | P.92226E2-5-3 / OH751     |
| 318 | OH08-207-73 | P.92226E2-5-3 / OH751     |
| 319 | OH08-207-77 | P.92226E2-5-3 / OH751     |
| 320 | OH08-208-14 | P.92226E2-5-3 / OH751     |
| 321 | OH08-208-44 | P.92226E2-5-3 / OH751     |
| 322 | OH08-208-70 | P.92226E2-5-3 / OH751     |
| 323 | OH08-209-15 | P.92226E2-5-3 / OH751     |
| 324 | OH08-209-42 | P.92226E2-5-3 / OH751     |
| 325 | OH08-209-6  | P.92226E2-5-3 / OH751     |
| 326 | OH08-209-71 | P.92226E2-5-3 / OH751     |
| 327 | OH08-227-24 | OH738 / HONEY             |
| 328 | OH08-227-49 | OH738 / HONEY             |
| 329 | OH08-228-30 | OH738 / HONEY             |
| 330 | OH08-229-49 | OH738 / HONEY             |
| 331 | OH08-229-63 | OH738 / HONEY             |
| 332 | OH08-231-21 | OH738 / CECIL             |
| 333 | OH08-232-44 | OH738 / CECIL             |
| 334 | OH08-232-70 | OH738 / CECIL             |
| 335 | OH08-233-19 | OH738 / CECIL             |
| 336 | OH08-234-2  | OH738 / OH740             |
| 337 | OH08-234-32 | OH738 / OH740             |
| 338 | OH08-234-37 | OH738 / OH740             |
| 339 | OH08-234-4  | OH738 / OH740             |
| 340 | OH08-234-54 | OH738 / OH740             |
| 341 | OH08-235-11 | OH738 / OH740             |
| 342 | OH08-209-75 | P.92226E2-5-3 / OH751     |
| 343 | OH08-210-14 | P.92226E2-5-3 / MCCORMICK |
| 344 | OH08-210-27 | P.92226E2-5-3 / MCCORMICK |
| 345 | OH08-210-51 | P.92226E2-5-3 / MCCORMICK |
| 346 | OH08-210-55 | P.92226E2-5-3 / MCCORMICK |
| 347 | OH08-210-75 | P.92226E2-5-3 / MCCORMICK |
| 348 | OH08-211-51 | P.92226E2-5-3 / MCCORMICK |
| 349 | OH08-211-70 | P.92226E2-5-3 / MCCORMICK |
| 350 | OH08-211-74 | P.92226E2-5-3 / MCCORMICK |
| 351 | OH08-212-15 | P.92226E2-5-3 / MCCORMICK |
| 352 | OH08-212-31 | P.92226E2-5-3 / MCCORMICK |
| 353 | OH08-212-46 | P.92226E2-5-3 / MCCORMICK |



|     |             |                         |
|-----|-------------|-------------------------|
| 354 | OH08-216-10 | IL98-4364 / HONEY       |
| 355 | OH08-235-33 | OH738 / OH740           |
| 356 | OH08-237-19 | OH751 / OH738           |
| 357 | OH08-238-4  | P.961341A3-2-2 / HONEY  |
| 358 | OH08-216-49 | IL98-4364 / HONEY       |
| 359 | OH08-216-57 | IL98-4364 / HONEY       |
| 360 | OH08-217-34 | IL98-4364 / HONEY       |
| 361 | OH08-217-37 | IL98-4364 / HONEY       |
| 362 | OH08-217-74 | IL98-4364 / HONEY       |
| 363 | OH08-217-9  | IL98-4364 / HONEY       |
| 364 | OH08-218-37 | IL98-4364 / HONEY       |
| 365 | OH08-218-6  | IL98-4364 / HONEY       |
| 366 | OH08-219-66 | IL98-4364 / HONEY       |
| 367 | OH08-220-43 | IL98-4364 / CECIL       |
| 368 | OH08-220-68 | IL98-4364 / CECIL       |
| 369 | OH08-221-27 | IL98-4364 / CECIL       |
| 370 | OH08-221-50 | IL98-4364 / CECIL       |
| 371 | OH08-221-63 | IL98-4364 / CECIL       |
| 372 | OH08-222-16 | IL98-4364 / CECIL       |
| 373 | OH08-223-25 | IL98-4364 / OH740       |
| 374 | OH08-239-31 | P.961341A3-2-2 / HONEY  |
| 375 | OH08-239-35 | P.961341A3-2-2 / HONEY  |
| 376 | OH08-239-63 | P.961341A3-2-2 / HONEY  |
| 377 | OH08-239-67 | P.961341A3-2-2 / HONEY  |
| 378 | OH08-240-31 | P.961341A3-2-2 / HONEY  |
| 379 | OH08-240-46 | P.961341A3-2-2 / HONEY  |
| 380 | OH08-241-22 | P.961341A3-2-2 / HONEY  |
| 381 | OH08-241-63 | P.961341A3-2-2 / HONEY  |
| 382 | OH08-241-67 | P.961341A3-2-2 / HONEY  |
| 383 | OH08-242-15 | P.961341A3-2-2 / CECIL  |
| 384 | OH08-242-30 | P.961341A3-2-2 / CECIL  |
| 385 | OH08-253-35 | MCCORMICK / OH751       |
| 386 | OH08-253-41 | MCCORMICK / OH751       |
| 387 | OH08-254-22 | TRIBUTE / P.92226E2-5-3 |
| 388 | OH08-254-24 | TRIBUTE / P.92226E2-5-3 |
| 389 | OH08-254-28 | TRIBUTE / P.92226E2-5-3 |
| 390 | OH08-254-6  | TRIBUTE / P.92226E2-5-3 |
| 391 | OH08-254-66 | TRIBUTE / P.92226E2-5-3 |
| 392 | OH08-255-29 | TRIBUTE / P.92226E2-5-3 |
| 393 | OH08-256-31 | TRIBUTE / P.92226E2-5-3 |
| 394 | OH08-242-31 | P.961341A3-2-2 / CECIL  |
| 395 | OH08-242-38 | P.961341A3-2-2 / CECIL  |
| 396 | OH08-242-51 | P.961341A3-2-2 / CECIL  |
| 397 | OH08-242-71 | P.961341A3-2-2 / CECIL  |
| 398 | OH08-242-78 | P.961341A3-2-2 / CECIL  |

|     |             |                         |
|-----|-------------|-------------------------|
| 399 | OH08-243-15 | P.961341A3-2-2 / CECIL  |
| 400 | OH08-243-23 | P.961341A3-2-2 / CECIL  |
| 401 | OH08-243-31 | P.961341A3-2-2 / CECIL  |
| 402 | OH08-243-46 | P.961341A3-2-2 / CECIL  |
| 403 | OH08-244-10 | P.961341A3-2-2 / CECIL  |
| 404 | OH08-244-2  | P.961341A3-2-2 / CECIL  |
| 405 | OH08-244-28 | P.961341A3-2-2 / CECIL  |
| 406 | OH08-244-52 | P.961341A3-2-2 / CECIL  |
| 407 | OH08-244-57 | P.961341A3-2-2 / CECIL  |
| 408 | OH08-245-24 | P.961341A3-2-2 / OH740  |
| 409 | OH08-256-35 | TRIBUTE / P.92226E2-5-3 |
| 410 | OH08-256-47 | TRIBUTE / P.92226E2-5-3 |
| 411 | OH08-256-66 | TRIBUTE / P.92226E2-5-3 |
| 412 | OH08-257-27 | TRIBUTE / P.92226E2-5-3 |
| 413 | OH08-262-27 | ROANE / HOPEWELL        |
| 414 | OH08-262-36 | ROANE / HOPEWELL        |
| 415 | OH08-262-42 | ROANE / HOPEWELL        |
| 416 | OH08-262-55 | ROANE / HOPEWELL        |
| 417 | OH08-245-47 | P.961341A3-2-2 / OH740  |
| 418 | OH08-245-5  | P.961341A3-2-2 / OH740  |
| 419 | OH08-245-55 | P.961341A3-2-2 / OH740  |
| 420 | OH08-246-10 | P.961341A3-2-2 / OH740  |
| 421 | OH08-246-15 | P.961341A3-2-2 / OH740  |
| 422 | OH08-247-15 | P.961341A3-2-2 / OH740  |
| 423 | OH08-247-3  | P.961341A3-2-2 / OH740  |
| 424 | OH08-247-39 | P.961341A3-2-2 / OH740  |
| 425 | OH08-247-48 | P.961341A3-2-2 / OH740  |
| 426 | OH08-247-77 | P.961341A3-2-2 / OH740  |
| 427 | OH08-248-23 | P.961341A3-2-2 / OH740  |
| 428 | OH08-263-3  | DOUGLAS / IL97-3632     |
| 429 | OH08-263-34 | DOUGLAS / OH751         |
| 430 | OH08-264-24 | MCCORMICK / OH751       |
| 431 | OH08-264-29 | MCCORMICK / OH751       |
| 432 | OH08-264-67 | MCCORMICK / OH751       |
| 433 | OH08-265-11 | DOUGLAS / P.92226E2-5-3 |
| 434 | OH08-265-13 | DOUGLAS / P.92226E2-5-3 |
| 435 | OH08-265-37 | DOUGLAS / P.92226E2-5-3 |
| 436 | OH08-265-45 | DOUGLAS / P.92226E2-5-3 |
| 437 | OH08-248-54 | P.961341A3-2-2 / OH740  |
| 438 | OH08-248-62 | P.961341A3-2-2 / OH740  |
| 439 | OH08-248-70 | P.961341A3-2-2 / OH740  |
| 440 | OH08-248-77 | P.961341A3-2-2 / OH740  |
| 441 | OH08-248-8  | P.961341A3-2-2 / OH740  |
| 442 | OH08-268-39 | P.961341A3-2-2 / CECIL  |
| 443 | OH08-268-56 | TRIBUTE / P.92226E2-5-3 |

|     |             |                         |
|-----|-------------|-------------------------|
| 444 | OH08-268-74 | TRIBUTE / P.92226E2-5-3 |
| 445 | OH08-266-27 | VA98W-706 / IL97-3632   |
| 446 | OH08-266-9  | VA98W-706 / IL97-3632   |
| 447 | OH08-267-14 | P.961341A3-2-2 / HONEY  |
| 448 | OH08-267-16 | P.961341A3-2-2 / HONEY  |
| 449 | OH08-267-25 | P.961341A3-2-2 / HONEY  |
| 450 | OH08-267-3  | P.961341A3-2-2 / HONEY  |
| 451 | OH08-267-34 | P.961341A3-2-2 / HONEY  |
| 452 | OH08-268-11 | P.961341A3-2-2 / CECIL  |
| 453 | OH08-268-23 | P.961341A3-2-2 / CECIL  |
| 454 | OH08-268-30 | P.961341A3-2-2 / CECIL  |
| 455 | OH08-269-6  | P.92226E2-5-3 / OH751   |
| 456 | OH08-3-29   | TRUMAN / OH751          |
| 457 | OH08-3-35   | TRUMAN / OH751          |
| 458 | OH08-3-41   | TRUMAN / OH751          |
| 459 | OH08-97-24  | TRUMAN / IL97-3632      |
| 460 | OH08-97-47  | TRUMAN / IL97-3632      |
| 461 | OH08-97-9   | TRUMAN / IL97-3632      |
| 462 | OH08-98-13  | TRUMAN / IL97-3632      |
| 463 | OH08-98-29  | TRUMAN / IL97-3632      |
| 464 | OH08-98-6   | TRUMAN / IL97-3632      |
| 465 | OH08-98-75  | TRUMAN / IL97-3632      |
| 466 | OH08-99-23  | TRUMAN / IL97-3632      |
| 467 | OH08-99-25  | TRUMAN / IL97-3632      |
| 468 | OH08-99-31  | TRUMAN / IL97-3632      |
| 469 | OH08-99-41  | TRUMAN / IL97-3632      |
| 470 | OH08-99-50  | TRUMAN / IL97-3632      |

---
