# Supplementary material for: Optimizing Training Population Data and Validation of Genomic Selection for Economic Traits in Soft Winter Wheat
Source: PubMed Central journal article supplement (PMC5015948; doi:10.1534/g3.116.032532), 2016-07-20
Supplement: supp_g3.116.032532_TableS2.pdf [file supp_g3.116.032532_TableS2.pdf]

Table S2. Summary of the 23 lines in the parental line population (PP). \* indicates a parent that was not included in the analysis due to a lack of seed.

| Name            | % of training population parentage | Pedigree                                                                                 |
|-----------------|------------------------------------|------------------------------------------------------------------------------------------|
| ERIE (OH751)    | 9.3                                | 10584-0801/COKER9663                                                                     |
| HOPEWELL        | 5.7                                | LOGAN/HART//3270A/ROUSSALKA/3/TN16<br>85/IA22/6767/216-6-3                               |
| CECIL           | 3.3                                | BLUEBOY2/CLARK//HOWELL/OH416                                                             |
| OH708           | 3.2                                | IL85-3132-1/IRENA//OH449/VA85-54-290                                                     |
| OH740*          | 3.1                                | L89060/OH529                                                                             |
| OH738           | 2.9                                | L890690/T814                                                                             |
| FREEDOM         | 2.0                                | GR876/OH217                                                                              |
| HONEY           | 9.8                                | DYNASTY/3/NASW84-<br>345/COKER9835//OH419/OH389                                          |
| PATTON          | 3.4                                | SW85*94/IN82104B1-3-2                                                                    |
| DOUGLAS         | 3.1                                | Pio.2510/M92*3449                                                                        |
| BRAVO           | 1.9                                | 0                                                                                        |
| 92226E2-5-3     | 10.3                               | 86982/844030//86350/831800                                                               |
| 961341A3-2-2    | 5.8                                | P9017//INW9824/3/P107/PATTERSON                                                          |
| 92145E8-7-7-1-9 | 3.4                                | COKER84-<br>27/COTIPORA//ROAZON/CALDWELL*2                                               |
| PATTERSON       | 1.2                                | P.69184B8-21-1-1-2-4*2/CALDWELL                                                          |
| IL97-3632       | 4.5                                | Howell/IL90-9464//IL90-4813                                                              |
| IL98-4364       | 2.8                                | OH530/Patterson                                                                          |
| IL96-6472       | 2.4                                | IL90-11637/L880437                                                                       |
| TRUMAN          | 4.1                                | MO11769/MADISON                                                                          |
| VA98W-706       | 7                                  | VA91-54-350//FFR555W/Gore                                                                |
| ROANE           | 6.9                                | VA71-54-147/COKER68-15//IN65309C1-18-2-<br>3-2                                           |
| TRIBUTE         | 2.1                                | IN71761A4-31-5-48//VA71-54-<br>147/MCNAIR1813)/AL870365(COKER747*2/<br>AMIGO)            |
| MCCORMICK       | 1.8                                | VA92-51-39(IN71761A4-31-5-48//VA71-54-<br>147/MCNAIR1813)/AL870365(COKER747*2/<br>AMIGO) |
