# Supplementary material for: Optimizing Training Population Data and Validation of Genomic Selection for Economic Traits in Soft Winter Wheat
Source: PubMed Central journal article supplement (PMC5015948; doi:10.1534/g3.116.032532), 2016-07-20
Supplement: supp_g3.116.032532_TableS3.pdf [file supp_g3.116.032532_TableS3.pdf]

Table S3. Summary of the 93 lines in the validation population (VP)

| Name        | Pedigree                  |
|-------------|---------------------------|
| OH10-306-43 | 981359C1-4-2-1-8/BRANSON  |
| OH10-308-46 | 981359C1-4-2-1-8/M99-2408 |
| OH10-123-3  | 9819RB-D1-30/OH02-13581   |
| OH10-151-70 | B980582/OH02-12686        |
| OH10-153-41 | B980582/OH753             |
| OH10-155-35 | B980582/OH776             |
| OH10-156-2  | B980582/P.99608C1-1-3     |
| OH10-158-62 | B980582/P.99608C1-1-3     |
| OH10-158-69 | B980582/P.99608C1-1-3     |
| OH10-317-7  | B980582/99608C1-1-3       |
| OH10-185-30 | BRANSON/B980582           |
| OH10-194-16 | BRANSON/IL00-8061         |
| OH10-194-33 | BRANSON/IL00-8061         |
| OH10-194-46 | BRANSON/IL00-8061         |
| OH10-198-15 | BRANSON/IL96-24851-1      |
| OH10-200-49 | BRANSON/IL96-24851-1      |
| OH10-201-32 | BRANSON/M99-2408          |
| OH10-201-65 | BRANSON/M99-2408          |
| OH10-203-55 | BRANSON/M99-2408          |
| OH10-204-59 | BRANSON/M99-2408          |
| OH10-186-24 | BRANSON/B980582           |
| OH10-213-21 | BRANSON/OH02-3409         |
| OH10-222-78 | BRANSON/TRUMAN            |
| OH10-223-2  | BRANSON/TRUMAN            |
| OH10-308-23 | BRANSON/M99-2408          |
| OH10-308-27 | BRANSON/M99-2408          |
| OH10-303-54 | BRANSON/TRUMAN            |
| OH08-133-25 | HONEY/COKER9663           |
| OH08-132-51 | HONEY/COKER9663           |
| OH08-133-14 | HONEY/COKER9663           |
| OH08-133-41 | HONEY/COKER9663           |
| OH07-136-66 | HONEY/OH719               |
| OH10-167-30 | IL00-8061/M99-2408        |
| OH10-250-19 | IL00-8061/MO980829        |
| OH10-304-30 | IL00-8061/M99-2408        |
| OH10-304-42 | IL00-8061/M99-2408        |
| OH10-304-71 | IL00-8061/M99-2408        |
| OH10-304-27 | IL00-8061/M99-2408        |
| OH10-104-31 | IL96-24851-1/IL00-8061    |
| OH10-94-23  | IL96-24851-1/M99-2408     |
| OH10-95-17  | IL96-24851-1/M99-2408     |
| OH10-316-61 | IL96-24851-1/M99-2408     |

|             |                               |
|-------------|-------------------------------|
| OH10-173-55 | IL97-6268/B980582             |
| OH10-179-19 | IL97-6268/OH776               |
| OH10-179-35 | IL97-6268/OH776               |
| OH10-182-75 | IL97-6268/P.99608C1-1-3       |
| OH10-227-31 | M99-2408/CECIL                |
| OH10-231-26 | M99-2408/IL97-6268            |
| OH10-231-54 | M99-2408/IL97-6268            |
| OH10-231-6  | M99-2408/IL97-6268            |
| OH10-237-51 | M99-2408/OH01-75              |
| OH10-238-15 | M99-2408/OH01-75              |
| OH10-238-59 | M99-2408/OH01-75              |
| OH10-239-28 | M99-2408/OH02-12686           |
| OH10-240-53 | M99-2408/OH02-12686           |
| OH10-240-6  | M99-2408/OH02-12686           |
| OH10-241-49 | M99-2408/OH02-12686           |
| OH10-241-53 | M99-2408/OH02-12686           |
| OH10-242-45 | M99-2408/OH02-12686           |
| OH10-244-27 | M99-2408/OH753                |
| OH10-101-54 | M99-2408/P.981359C1-4-2-1-8   |
| OH10-103-72 | M99-2408/P.981359C1-4-2-1-8   |
| OH10-245-63 | M99-2408/P.99608C1-1-3        |
| OH10-246-14 | M99-2408/P.99608C1-1-3        |
| OH10-246-26 | M99-2408/P.99608C1-1-3        |
| OH10-247-15 | M99-2408/P.99608C1-1-3        |
| OH10-305-76 | M99-2408/981359C1-4-2-1-8     |
| OH10-305-39 | M99-2408/P.981359C1-4-2-1-8   |
| OH10-305-47 | M99-2408/P.981359C1-4-2-1-8   |
| OH10-305-55 | M99-2408/P.981359C1-4-2-1-8   |
| OH10-305-59 | M99-2408/P.981359C1-4-2-1-8   |
| OH10-315-5  | M99-2408/OH02-12686           |
| OH10-316-14 | M99-2408/OH02-12686           |
| OH10-316-20 | M99-2408/OH02-12686           |
| OH10-316-22 | M99-2408/OH02-12686           |
| OH10-292-7  | OH02-12686/P.981359C1-4-2-1-8 |
| OH10-300-21 | OH02-12686/MO980829           |
| OH10-306-22 | OH708/99608C1-1-3             |
| OH10-271-34 | OH708/IL97-6268               |
| OH10-204-78 | BRANSON/M99-2408              |
| OH07-261-37 | OH728/VA97W-361WS             |
| OH10-128-47 | OH776/9819RB-D1-42            |
| OH10-307-9  | 99608C1-1-3/BRANSON           |
| OH10-219-65 | P.99608C1-1-3/BRANSON         |
| OH10-220-3  | P.99608C1-1-3/BRANSON         |
| OH10-221-64 | P.99608C1-1-3/BRANSON         |
| OH10-90-12  | TRUMAN/IL00-8061              |

|             |                  |
|-------------|------------------|
| OH10-91-17  | TRUMAN/IL00-8061 |
| OH10-91-37  | TRUMAN/IL00-8061 |
| OH10-91-54  | TRUMAN/IL00-8061 |
| OH10-92-23  | TRUMAN/IL00-8061 |
| OH10-92-55  | TRUMAN/IL00-8061 |
| OH10-92-78  | TRUMAN/IL00-8061 |
| OH10-301-45 | TRUMAN/IL00-8061 |

---
