# Supplementary material for: Optimizing Training Population Data and Validation of Genomic Selection for Economic Traits in Soft Winter Wheat
Source: PubMed Central journal article supplement (PMC5015948; doi:10.1534/g3.116.032532), 2016-07-20
Supplement: supp_g3.116.032532_TableS4.pdf [file supp_g3.116.032532_TableS4.pdf]

Table S4. Accuracy of genomic selection when using subsets of non-significant markers (M&, e.g.,  $p > 0.05$ ) as compared to the accuracy using all markers (M1), or just the significant markers (M2,  $p < 0.05$ ).

| Trait                               | All Markers = M1 | Markers with $p < 0.05$ = M3 | Markers with $p > 0.05$ = M7 | M7 as % of M1 | M7 as % of M2 |
|-------------------------------------|------------------|------------------------------|------------------------------|---------------|---------------|
| No. Markers for GYA, GYW, GYN       | 33169            | 2902                         | 30267                        |               |               |
| GYA, n=470                          | 0.46             | 0.77                         | 0.33                         | 71.7          | 42.9          |
| GYA, n=400                          | 0.45             | 0.82                         | 0.31                         | 68.9          | 37.8          |
| GYW, n=470                          | 0.57             | 0.79                         | 0.48                         | 84.2          | 60.8          |
| GYW, n=400                          | 0.54             | 0.60                         | 0.44                         | 81.5          | 73.3          |
| GYN, n=470                          | 0.43             | 0.36                         | 0.43                         | 100.0         | 119.4         |
| GYN, n=400                          | 0.33             | 0.77                         | 0.23                         | 69.7          | 29.9          |
| GYW to predict GYN, n=470           | -0.08            | -0.10                        | -0.07                        |               |               |
| GYW to predict GYN, n=400           | 0.16             | 0.31                         | 0.07                         | 43.8          | 22.6          |
| GYN to predict GYW, n=470           | -0.11            | -0.16                        | -0.09                        |               |               |
| GYN to predict GYW, n=400           | 0.19             | 0.28                         | 0.11                         | 57.9          | 39.3          |
| No. Markers for FHB                 | 33169            | 1556                         | 31613                        |               |               |
| FHB, n=470                          | 0.35             | 0.64                         | 0.28                         | 80.0          | 43.8          |
| FHB, n=440                          | 0.37             | 0.81                         | 0.26                         | 70.3          | 32.1          |
| 2010 FHB to predict 2011 FHB, n=470 | 0.15             | 0.17                         | 0.13                         | 86.7          | 76.5          |
| 2010 FHB to predict 2011 FHB, n=440 | 0.15             | 0.17                         | 0.14                         | 93.3          | 82.4          |
| 2011 FHB to predict 2010 FHB, n=470 | 0.15             | 0.32                         | 0.13                         | 86.7          | 40.6          |
| 2011 FHB to predict 2010 FHB, n=440 | 0.17             | 0.38                         | 0.14                         | 82.4          | 36.8          |
| No. Markers for SE                  | 33169            | 1672                         | 31537                        |               |               |
| SE, n=470                           | 0.51             | 0.87                         | 0.55                         | 107.8         | 63.2          |
| SE, n=447                           | 0.51             | 0.89                         | 0.55                         | 107.8         | 61.8          |
| 2010 SE to predict 2011 SE, n=470   | 0.33             | 0.57                         | 0.55                         | 166.7         | 96.5          |
| 2010 SE to predict 2011 SE, n=447   | 0.33             | 0.58                         | 0.58                         | 175.8         | 100.0         |
| 2011 SE to predict 2010 SE, n=470   | 0.24             | 0.32                         | 0.46                         | 191.7         | 143.8         |
| 2011 SE to predict 2010 SE, n=447   | 0.24             | 0.32                         | 0.47                         | 195.8         | 146.9         |
| No. Markers for FY                  | 33169            | 1632                         | 31497                        |               |               |
| FY, n=470                           | 0.62             | 0.91                         | 0.4                          | 64.5          | 44.0          |
| FY, n=447                           | 0.64             | 0.91                         | 0.39                         | 60.9          | 42.9          |
| 2010 FY to predict 2011 FY, n=470   | 0.57             | 0.70                         | 0.29                         | 50.9          | 41.4          |
| 2010 FY to predict 2011 FY, n=447   | 0.61             | 0.74                         | 0.29                         | 47.5          | 39.2          |
| 2011 FY to predict 2010 FY, n=470   | 0.48             | 0.49                         | 0.21                         | 43.8          | 42.9          |
| 2011 FY to predict 2010 FY, n=447   | 0.49             | 0.50                         | 0.21                         | 42.9          | 42.0          |
